# Supplementary material for: An Improved Phenotype-Driven Tool for Rare Mendelian Variant Prioritization: Benchmarking Exomiser on Real Patient Whole-Exome Data
Source: PubMed Central journal article supplement (PMC7230372; doi:10.3390/genes11040460), 2020-04-23
Supplement: genes-11-00460-s001.pdf [file genes-11-00460-s001.pdf]

**An Improved Phenotype-Driven Tool for Rare Mendelian Variant Prioritization:  
Benchmarking Exomiser on Real Patient Whole-Exome Data**

Valentina Cipriani et al.

**Supplementary Materials**

**Table S1. Molecular diagnosis (diagnosed gene, genotype and variant(s)) of the 134 patients in the IRD dataset.**

| Patient identifier | Clinical diagnosis label <sup>a</sup> | Molecular diagnosis |                       |                                 |                         |
|--------------------|---------------------------------------|---------------------|-----------------------|---------------------------------|-------------------------|
|                    |                                       | Gene                | Genotype <sup>b</sup> | Variant 1                       | Variant 2               |
| P1                 | ACHM                                  | <i>CNGB3</i>        | HOM                   | c.1810C>T:p.(Arg604*)           |                         |
| P2                 | ACHM                                  | <i>CNGB3</i>        | HOM                   | c.1148del:p.(Thr383Ilefs*13)    |                         |
| P3                 | ACHM                                  | <i>ATF6</i>         | HOM                   | c.970C>T:p.(Arg324Cys)          |                         |
| P4                 | ACHM                                  | <i>POC1B</i>        | HOM                   | c.130-138del:p.(Ile44-Leu46del) |                         |
| P5                 | ACHM                                  | <i>ATF6</i>         | HOM                   | c.1187+5G>C:p.?                 |                         |
| P6                 | ACHM                                  | <i>GNAT2</i>        | HOM                   | c.906C>A:p.(Tyr302*)            |                         |
| P7                 | BFR                                   | <i>PLA2G5</i>       | HOM                   | c.133G>T:p.(Gly45Cys)           |                         |
| P8                 | COLOB                                 | <i>YAP1</i>         | HET                   | c.284T>C:p.(Phe95Ser)           |                         |
| P9                 | CRD                                   | <i>GUCAL1</i>       | HET                   | c.332A>C:p.(Glu111Ala)          |                         |
| P10                | CRD                                   | <i>AH11</i>         | compHET               | c.2945G>T:p.(Arg982Met)         | c.1558A>G:p.(Lys520Glu) |
| P11                | CRD                                   | <i>PROM1</i>        | HET                   | c.1117C>T:p.(Arg373Cys)         |                         |

|     |      |                |         |                                    |                              |
|-----|------|----------------|---------|------------------------------------|------------------------------|
| P12 | CRD  | <i>PROM1</i>   | HOM     | c.436C>T:p.(Arg146*)               |                              |
| P13 | CRD  | <i>RPGR</i>    | HEMI    | c.3039_3040del:p.(Glu1018Argfs*60) |                              |
| P14 | CRD  | <i>ABCA4</i>   | compHET | c.2861A>C:p.(Tyr954Ser)            | c.3191-1G>T:p.?              |
| P15 | CRD  | <i>MERTK</i>   | HOM     | c.1470del:p.(Pro490Profs*25)       |                              |
| P16 | CRD  | <i>TLL5</i>    | HOM     | c.1627G>T:p.(Glu543*)              |                              |
| P17 | CRD  | <i>CERKL</i>   | HOM     | c.316C>A:p.(Arg106Ser)             |                              |
| P18 | CRD  | <i>CFAP410</i> | HOM     | c.218G>C:p.(Arg73Pro)              |                              |
| P19 | CRD  | <i>AGBL5</i>   | HOM     | c.323C>G:p.(Pro108Arg)             |                              |
| P20 | CRD  | <i>CFAP410</i> | compHET | c.218G>C:p.(Arg73Pro)              | c.655A>T:p.(Ile219Phe)       |
| P21 | CRD  | <i>CDHR1</i>   | HOM     | c.1463del:p.(Gly488Alafs*20)       |                              |
| P22 | CRD  | <i>CDHR1</i>   | HOM     | c.1463del:p.(Gly488Alafs*20)       |                              |
| P23 | CSNB | <i>NYX</i>     | HEMI    | c.998_1003del:p.(Leu333_Phe334del) |                              |
| P24 | CSNB | <i>TRPM1</i>   | compHET | c.380G>A:p.(Gly127Glu)             | c.832G>A:p.(Gly278Arg)       |
| P25 | CSNB | <i>GPR179</i>  | compHET | c.870dup:p.(Asn291*)               | c.1368del:p.(Phe456Leufs*30) |
| P26 | CSNB | <i>RBP3</i>    | HOM     | c.3454G>T:p.(Glu1152*)             |                              |
| P27 | CSNB | <i>TRNT1</i>   | HOM     | c.295C>T:p.(Arg99Trp)              |                              |
| P28 | EORD | <i>LCA5</i>    | HOM     | c.617T>C:p.(Leu206Pro)             |                              |
| P29 | EORD | <i>PDE6A</i>   | HOM     | c.769C>T:p.(Arg257*)               |                              |
| P30 | EORD | <i>BBS1</i>    | HOM     | c.200G>A:p.(Arg67Glnext*-67)       |                              |
| P31 | EORD | <i>CDH3</i>    | HOM     | c.2357del:p.(Gly786Alafs*7)        |                              |
| P32 | EORD | <i>CRY</i>     | HET     | c.624T>A:p.(Tyr208*)               |                              |
| P33 | EORD | <i>IMPG2</i>   | HOM     | c.1875_1879dup:p.(Pro627Leufs*25)  |                              |
| P34 | EORD | <i>ADAM9</i>   | HOM     | c.967del:p.(Ser323Glnfs*33)        |                              |
| P35 | EORD | <i>IQCB1</i>   | compHET | c.825_828del:p.(Arg275Serfs*6)     | c.745A>T:p.(Arg249*)         |
| P36 | EORD | <i>CEP290</i>  | HOM     | c.2450T>G:p.(Ile817Ser)            |                              |
| P37 | FEVR | <i>LRP5</i>    | compHET | c.1435G>A:p.(Gly479Arg)            | c.4097A>G:p.(Asp1366Gly)     |
| P38 | FH   | <i>HPS6</i>    | HOM     | c.779G>A:p.(Gly260Glu)             |                              |
| P39 | LCA  | <i>ABCA4</i>   | compHET | c.4918C>T:p.(Arg1640Trp)           | c.2041C>T:p.(Arg681*)        |
| P40 | LCA  | <i>GUCY2D</i>  | HOM     | c.2120T>C:p.(Leu707Pro)            |                              |
| P41 | LCA  | <i>COL18A1</i> | HOM     | c.714dup:p.(Gly239Argfs*9)         |                              |

|     |     |                |         |                                   |                          |
|-----|-----|----------------|---------|-----------------------------------|--------------------------|
| P42 | LCA | <i>GUCY2D</i>  | HOM     | c.652del:p.(Met218Trpfs*13)       |                          |
| P43 | LCA | <i>DHX38</i>   | HOM     | c.971G>A:p.(Arg324Gln)            |                          |
| P44 | LCA | <i>SRD5A3</i>  | HOM     | c.57G>A:p.(Trp19*)                |                          |
| P45 | LCA | <i>GUCY2D</i>  | HOM     | c.2836G>A:p.(Ala946Thr)           |                          |
| P46 | LCA | <i>RPGRIP1</i> | compHET | c.711del:p.(Pro237Profs*38)       | c.2786A>G:p.(Tyr929Cys)  |
| P47 | LCA | <i>CEP290</i>  | HOM     | c.148C>T:p.(His50Tyr)             |                          |
| P48 | LCA | <i>CRB1</i>    | compHET | c.976T>C:p.(Cys326Arg)            | c.1798C>T:p.(Gln600*)    |
| P49 | LCA | <i>NMNAT1</i>  | HOM     | c.53A>G:p.(Asn18Ser)              |                          |
| P50 | LCA | <i>CLN3</i>    | HOM     | c.932C>A:p.(Ser311Tyr)            |                          |
| P51 | LCA | <i>TUB</i>     | HOM     | c.1194_1195del:p.(Arg398Serfs*10) |                          |
| P52 | LCA | <i>KCNJ13</i>  | HOM     | c.496C>T:p.(Arg166*)              |                          |
| P53 | LCA | <i>LCA5</i>    | HOM     | c.1676C>A:p.(Ser559*)             |                          |
| P54 | LCA | <i>RPI1</i>    | HOM     | c.1458_1461dup:p.(Glu488*)        |                          |
| P55 | LCA | <i>BBS1</i>    | HOM     | c.200G>A:p.(Arg67Glnext*-67)      |                          |
| P56 | LCA | <i>IMPG2</i>   | HOM     | c.68dup:p.(Asp23Glufs*29)         |                          |
| P57 | LCA | <i>IFT140</i>  | HOM     | c.1451C>T:p.(Thr484Met)           |                          |
| P58 | LCA | <i>SPATA7</i>  | HOM     | c.864dup:p.(Pro289Thrfs*6)        |                          |
| P59 | LCA | <i>GUCY2D</i>  | HOM     | c.2395_2398dup:p.(His800Argfs*20) |                          |
| P60 | LCA | <i>TULP1</i>   | HOM     | c.751G>T:p.(Glu251*)              |                          |
| P61 | LCA | <i>IQCB1</i>   | HOM     | c.1363C>T:p.(Arg455*)             |                          |
| P62 | LCA | <i>ABCA4</i>   | compHET | c.161G>A:p.(Cys54Tyr)             | c.2160+1G>C;p.?          |
| P63 | LCA | <i>GUCY2D</i>  | HOM     | c.2828dup:p.(Arg944Alafs*27)      |                          |
| P64 | MD  | <i>MFSD8</i>   | HOM     | c.1361T>C:p.(Met454Thr)           |                          |
| P65 | MD  | <i>CRX</i>     | HET     | c.774T>A:p.(Tyr258*)              |                          |
| P66 | MD  | <i>GUCY2D</i>  | HET     | c.2512C>T:p.(Arg838Cys)           |                          |
| P67 | MD  | <i>GUCY2D</i>  | HET     | c.2512C>T:p.(Arg838Cys)           |                          |
| P68 | MD  | <i>CRX</i>     | HET     | c.121C>T:p.(Arg41Trp)             |                          |
| P69 | MD  | <i>RPGR</i>    | HEMI    | c.3317dup:p.(Ser1107Valfs*4)      |                          |
| P70 | MD  | <i>CRX</i>     | HET     | c.127C>T:p.(Arg43Cys)             |                          |
| P71 | MD  | <i>ABCA4</i>   | compHET | c.3522G>A:p.(=)                   | c.5527C>G:p.(Arg1843Gly) |

|      |        |               |         |                                    |                                      |
|------|--------|---------------|---------|------------------------------------|--------------------------------------|
| P72  | MD     | <i>CRX</i>    | HET     | c.272G>A:p.(Arg91Lys)              |                                      |
| P73  | MD     | <i>ABCA4</i>  | compHET | c.5882G>A:p.(Gly1961Glu)           | c.885del:p.(Asp295Aspfs*5)           |
| P74  | MD     | <i>DRAM2</i>  | HOM     | c.362A>T:p.(His121Leu)             |                                      |
| P75  | MD     | <i>TLL5</i>   | HOM     | c.1586_1589del:p.(Glu529Valfs*2)   |                                      |
| P76  | MD     | <i>RPGR</i>   | HEMI    | c.3178_3179del:p.(Glu1066Glyfs*12) |                                      |
| P77  | MD     | <i>CDH3</i>   | HOM     | c.1568del:p.(Asn523Metfs*14)       |                                      |
| P78  | MD     | <i>TLL5</i>   | compHET | c.401del:p.(Leu134Argfs*45)        | c.3354G>A:p.(Trp1118*)               |
| P79  | MD     | <i>DRAM2</i>  | compHET | c.217_225del:p.(Val73_Tyr75del)    | c.79T>C:p.(Tyr27His)                 |
| P80  | STICKL | <i>COL9A3</i> | HOM     | c.1739dup:p.(Gly581Trpfs*20)       |                                      |
| P81  | OCMD   | <i>MFSD8</i>  | compHET | c.103C>T:p.(Arg35*)                | c.1006G>C:p.(Glu336Gln)              |
| P82  | OALB   | <i>GPR143</i> | HEMI    | c.839A>G:p.(Asn280Ser)             |                                      |
| P83  | OATR   | <i>KIF11</i>  | HET     | c.247C>T:p.(Arg83*)                |                                      |
| P84  | RD     | <i>EYS</i>    | compHET | c.7994G>A:p.(Gly2665Glu)           | c.2976T>A:p.(Cys992*)                |
| P85  | RD     | <i>LCA5</i>   | HOM     | c.633_639del:p.(Glu211Aspfs*13)    |                                      |
| P86  | RD     | <i>CERKL</i>  | HOM     | c.316C>A:p.(Arg106Ser)             |                                      |
| P87  | RP     | <i>PDE6A</i>  | HOM     | c.1630C>T:p.(Arg544Trp)            |                                      |
| P88  | RP     | <i>RPGR</i>   | HEMI    | c.126T>G:p.(Cys42Trp)              |                                      |
| P89  | RP     | <i>USH2A</i>  | compHET | c.2299del:p.(Glu767Serfs*21)       | c.6050-1G>A:p.?                      |
| P90  | RP     | <i>USH2A</i>  | compHET | c.7334C>T:p.(Ser2445Phe)           | c.3902G>T:p.(Gly1301Val)             |
| P91  | RP     | <i>IMPG2</i>  | compHET | c.2426G>A:p.(Trp809*)              | c.3412_3413insAA:p.(Ser1138Lysfs*21) |
| P92  | RP     | <i>CNGB1</i>  | compHET | c.952C>T:p.(Gln318*)               | c.3A>T:p.0?                          |
| P93  | RP     | <i>PDE6A</i>  | compHET | c.1630C>T:p.(Arg544Trp)            | c.769C>T:p.(Arg257*)                 |
| P94  | RP     | <i>RPGR</i>   | HEMI    | c.2323_2324del:p.(Arg775Glyfs*59)  |                                      |
| P95  | RP     | <i>CERKL</i>  | HOM     | c.847C>T:p.(Arg283*)               |                                      |
| P96  | RP     | <i>IMPG2</i>  | compHET | c.2426G>A:p.(Trp809*)              | c.118G>T:p.(Glu40*)                  |
| P97  | RP     | <i>RPGR</i>   | HEMI    | c.2236_2237del:p.(Lys751Glyfs*18)  |                                      |
| P98  | RP     | <i>RP1</i>    | HET     | c.2206dup:p.(Thr736Asnfs*4)        |                                      |
| P99  | RP     | <i>BBS1</i>   | HOM     | c.1169T>G:p.(Met390Arg)            |                                      |
| P100 | RP     | <i>RPGR</i>   | HEMI    | c.914dup:p.(Asn305Lysfs*41)        |                                      |
| P101 | RP     | <i>CRB1</i>   | HOM     | c.1337T>C:p.(Ile446Thr)            |                                      |

|      |      |               |         |                                    |                                 |
|------|------|---------------|---------|------------------------------------|---------------------------------|
| P102 | RP   | <i>RPI</i>    | HOM     | c.5883del:p.(Gln1961Glnfs*16)      |                                 |
| P103 | RP   | <i>CNGBI</i>  | compHET | c.664C>T:p.(Gln222*)               | c.262C>T:p.(Gln88*)             |
| P104 | RP   | <i>BBSI</i>   | HOM     | c.1169T>G:p.(Met390Arg)            |                                 |
| P105 | RP   | <i>USH2A</i>  | compHET | c.9882C>G:p.(Cys3294Trp)           | c.653T>A:p.(Val218Glu)          |
| P106 | RP   | <i>USH2A</i>  | compHET | c.13274C>T:p.(Thr4425Met)          | c.8981G>A:p.(Trp2994*)          |
| P107 | RP   | <i>CRBI</i>   | HOM     | c.782A>G:p.(Asn261Ser)             |                                 |
| P108 | RP   | <i>RPGR</i>   | HEMI    | c.2250_2251del:p.(Lys751Glyfs*18)  |                                 |
| P109 | RP   | <i>AH1I</i>   | compHET | c.2429C>T:p.(Pro810Leu)            | c.2087A>G:p.(His696Arg)         |
| P110 | RP   | <i>EYS</i>    | HOM     | c.490C>T:p.(Arg164*)               |                                 |
| P111 | RP   | <i>CRBI</i>   | HOM     | c.1819G>T:p.(Gly607*)              |                                 |
| P112 | RP   | <i>CNGBI</i>  | compHET | c.3139_3142dup:p.(Ala1048Glyfs*13) | c.3A>T:p.0?                     |
| P113 | RP   | <i>CNGBI</i>  | HOM     | c.3A>T:p.0?                        |                                 |
| P114 | RP   | <i>BBSI</i>   | HOM     | c.200G>A:p.(Arg67Glnext*-67)       |                                 |
| P115 | RP   | <i>PDE6B</i>  | HOM     | c.1485dup:p.(Pro496Alafs*5)        |                                 |
| P116 | RP   | <i>CNGBI</i>  | HOM     | c.761+2T>A:p.?                     |                                 |
| P117 | RP   | <i>AH1I</i>   | compHET | c.2090C>T:p.(Pro697Leu)            | c.660del:p.(Pro220Profs*11)     |
| P118 | RP   | <i>RP1L1</i>  | HOM     | c.603del:p.(Gly201Glyfs*30)        |                                 |
| P119 | RP   | <i>ARL2BP</i> | HOM     | c.134T>G:p.(Met45Arg)              |                                 |
| P120 | RP   | <i>ABCA4</i>  | HOM     | c.3393del:p.(Ala1131Alafs*17)      |                                 |
| P121 | RP   | <i>PROM1</i>  | HOM     | c.2346del:p.(Phe782Phefs*10)       |                                 |
| P122 | RP   | <i>TULP1</i>  | compHET | c.1081C>T:p.(Arg361*)              | c.1255C>T:p.(Arg419Trp)         |
| P123 | STGD | <i>ABCA4</i>  | HOM     | c.6658C>T:p.(Gln2220*)             |                                 |
| P124 | STGD | <i>ABCA4</i>  | compHET | c.3364G>A:p.(Glu1122Lys)           | c.1906C>T:p.(Gln636*)           |
| P125 | USH1 | <i>MYO7A</i>  | compHET | c.598A>G:p.(Ser200Gly)             | c.611A>C:p.(Lys204Thr)          |
| P126 | USH1 | <i>ADGRV1</i> | compHET | c.13919G>A:p.(Gly4640Glu)          | c.18610G>A:p.(Gly6204Ser)       |
| P127 | USH2 | <i>USH2A</i>  | compHET | c.3832_3834del:p.(Leu1278del)      | c.920_923dup:p.(His308Glnfs*16) |
| P128 | USH2 | <i>USH2A</i>  | HOM     | c.2299del:p.(Glu767Serfs*21)       |                                 |
| P129 | USH2 | <i>USH2A</i>  | compHET | c.1055C>T:p.(Thr352Ile)            | c.12819T>A:p.(Tyr4273*)         |
| P130 | USH2 | <i>ADGRV1</i> | HET     | c.8807C>G:p.(Ser2936*)             |                                 |
| P131 | USH2 | <i>USH2A</i>  | compHET | c.12954C>A:p.(Tyr4318*)            | c.5603T>G:p.(Phe1868Cys)        |

|      |      |               |         |                          |                                |
|------|------|---------------|---------|--------------------------|--------------------------------|
| P132 | USH2 | <i>USH2A</i>  | compHET | c.7594+2T>A:p.?          | c.4632G>C:p.(Lys1544Asn)       |
| P133 | USH2 | <i>ADGRV1</i> | compHET | c.3290-1G>A:p.?          | c.11242dup:p.(Glu3748Glyfs*10) |
| P134 | USH2 | <i>USH2A</i>  | compHET | c.5012G>A:p.(Gly1671Asp) | c.5252G>T:p.(Gly1751Val)       |

<sup>a</sup>Clinical diagnosis as assigned by a consultant ophthalmologist before performing whole-exome sequencing.

<sup>b</sup>HET = heterozygote; HOM = homozygote; compHET = compound heterozygote; HEMI = hemizygote.

**Table S2. List of HPO terms used to encode the 19 clinical diagnoses observed in the IRD patient dataset.**

| <b>Clinical diagnosis label</b> | <b>HPO terms</b>                                                       | <b>HPO term description</b>                                                                                                                                                                                                              |
|---------------------------------|------------------------------------------------------------------------|------------------------------------------------------------------------------------------------------------------------------------------------------------------------------------------------------------------------------------------|
| ACHM                            | HP:0011516, HP:0008275                                                 | Achromatopsia; Abnormal light-adapted electroretinogram                                                                                                                                                                                  |
| BFR                             | HP:0012045                                                             | Retinal flecks                                                                                                                                                                                                                           |
| COLOB                           | HP:0000480                                                             | Retinal coloboma                                                                                                                                                                                                                         |
| CRD                             | HP:0000548                                                             | Cone/Cone-rod dystrophy                                                                                                                                                                                                                  |
| CSNB                            | HP:0007642, HP:0007984                                                 | Congenital stationary night blindness; Electronegative ERG                                                                                                                                                                               |
| EORD                            | HP:0000556, HP:0011463                                                 | Retinal dystrophy; Childhood onset                                                                                                                                                                                                       |
| FEVR                            | HP:0030490                                                             | Exudative vitreoretinopathy                                                                                                                                                                                                              |
| FH                              | HP:0007750                                                             | Hypoplasia of the fovea                                                                                                                                                                                                                  |
| LCA                             | HP:0000556, HP:0007758, HP:0000550, HP:0000639                         | Retinal dystrophy; Visual impairment; Undetectable electroretinogram; Nystagmus                                                                                                                                                          |
| MD                              | HP:0007754                                                             | Macular dystrophy                                                                                                                                                                                                                        |
| STICKL                          | HP:0000545, HP:0008527                                                 | Myopia; Congenital sensorineural hearing impairment                                                                                                                                                                                      |
| OCMD                            | HP:0030636, HP:0030488                                                 | Occult macular dystrophy; Abnormal central response of multifocal electroretinogram                                                                                                                                                      |
| OALB                            | HP:0001107, HP:0007730, HP:0007750, HP:0030464                         | Ocular albinism; Iris hypopigmentation; Hypoplasia of the fovea; Asymmetrical distribution of pattern reversal visual evoked potentials                                                                                                  |
| OATR                            | HP:0001138, HP:0000649, HP:0030487                                     | Optic neuropathy; Abnormality of visual evoked potentials; Abnormal P50/N95 ratio of pattern electroretinogram                                                                                                                           |
| RD                              | HP:0000556                                                             | Retinal dystrophy                                                                                                                                                                                                                        |
| RP                              | HP:0000510                                                             | Rod-cone dystrophy                                                                                                                                                                                                                       |
| STGD                            | HP:0007754                                                             | Macular dystrophy                                                                                                                                                                                                                        |
| USH1                            | HP:0000510, HP:0008527, HP:0011476, HP:0007642, HP:0001751, HP:0000654 | Rod-cone dystrophy; Congenital sensorineural hearing impairment; Profound sensorineural hearing impairment; Congenital stationary night blindness; Vestibular dysfunction; Decreased light- and dark-adapted electroretinogram amplitude |
| USH2                            | HP:0000510, HP:0008527, HP:0012712, HP:0007642, HP:0000654             | Rod-cone dystrophy; Congenital sensorineural hearing impairment; Mild hearing impairment; Congenital stationary night blindness; Decreased light- and dark-adapted electroretinogram amplitude                                           |

**Table S3. Exomiser ranking of the correct disease-causing variants for the 4 cases in the IRD patient dataset who received a new (syndromic) diagnosis following whole-exome sequencing.**

| Patient identifier | Initial diagnosis (before WES) | New diagnosis (after WES)                                   | Gene           | Diagnosed variant          | Genotype | Exomiser rank using different analysis settings |      |       |     |       |     |            |          |
|--------------------|--------------------------------|-------------------------------------------------------------|----------------|----------------------------|----------|-------------------------------------------------|------|-------|-----|-------|-----|------------|----------|
|                    |                                |                                                             |                |                            |          | DEFAULT                                         | CADD | REVEL | MPC | M_CAP | MVP | PRIMATE_AI | VAR-ONLY |
| P38                | Foveal hypoplasia              | Hermansky-Pudlak syndrome                                   | <i>HPS6</i>    | c.779G>A:p.(Gly260Glu)     | HOM      | 1                                               | 1    | 1     | 17  | 25    | 1   | 1          | 7        |
| P41                | Leber congenital amaurosis     | Knobloch syndrome                                           | <i>COL18A1</i> | c.714dup:p.(Gly239Argfs*9) | HOM      | 2                                               | 2    | 1     | 1   | 1     | 1   | 1          | 4        |
| P44                | Leber congenital amaurosis     | <i>SRD5A3</i> -related congenital disorder of glycosylation | <i>SRD5A3</i>  | c.57G>A:p.(Trp19*)         | HOM      | 1                                               | 1    | 1     | 1   | 1     | 1   | 1          | 3.5      |
| P50                | Leber congenital amaurosis     | Batten disease                                              | <i>CLN3</i>    | c.932C>A:p.(Ser311Tyr)     | HOM      | 1                                               | 1    | 1     | 1   | 1     | 1   | 1          | 3        |

WES = Whole-Exome Sequencing



**Table S4. Exomiser ranking of the correct disease-causing variants for the 5 IRD patients with rank > 5 using the DEFAULT analysis settings.**

| Patient identifier | Gene         | Diagnosed variant               | Genotype | Exomiser rank using DEFAULT analysis settings | Exomiser variant score | Exomiser phenotype score | Exomiser phenotype matches                                                                                                                                                                                                                                                                                                                                                                                                                                                                                                                               |
|--------------------|--------------|---------------------------------|----------|-----------------------------------------------|------------------------|--------------------------|----------------------------------------------------------------------------------------------------------------------------------------------------------------------------------------------------------------------------------------------------------------------------------------------------------------------------------------------------------------------------------------------------------------------------------------------------------------------------------------------------------------------------------------------------------|
| P43                | <i>DHX38</i> | c.971G>A:p.(Arg324Gln)          | HOM      | 7                                             | 0.997                  | 0.502                    | <p><b>Proximity score 0.502 in interactome to <i>AAAS</i> and phenotypic similarity 0.617 to Achalasia-addisonianism-alacrimia syndrome associated with <i>AAAS</i></b><br/>           Best Phenotype Matches:<br/> <b>HP:0000556</b>, Retinal dystrophy - HP:0000648, Optic atrophy<br/> <b>HP:0000505</b>, Visual impairment – <i>no matches</i><br/> <b>HP:0000550</b>, Undetectable electroretinogram - HP:0000649, Abnormality of visual evoked potentials<br/> <b>HP:0000639</b>, Nystagmus – <i>no matches</i></p> <p><b>No known disease</b></p> |
| P4                 | <i>POC1B</i> | c.130_138del:p.(Ile44_Leu46del) | HOM      | 9                                             | 0.848                  | 0.587                    | <p><b>Phenotypic similarity 0.587 to Cone rod dystrophy associated with <i>POC1B</i></b><br/>           Best Phenotype Matches:<br/> <b>HP:0011516</b>, Achromatopsia - HP:0000551, Abnormality of color vision<br/> <b>HP:0008275</b>, Abnormal light-adapted electroretinogram – <i>no matches</i></p> <p><b>Known diseases:</b><br/>           OMIM:615973 Cone-rod dystrophy 20 - autosomal recessive<br/>           ORPHA:1872 Cone rod dystrophy</p>                                                                                               |

|     |               |                              |     |    |       |       |                                                                                                                                                                                                                                                                                                                                                                                                                                                                                                                                                                                                                                                                                                                                                                                                                                                                                                                                                                                                     |
|-----|---------------|------------------------------|-----|----|-------|-------|-----------------------------------------------------------------------------------------------------------------------------------------------------------------------------------------------------------------------------------------------------------------------------------------------------------------------------------------------------------------------------------------------------------------------------------------------------------------------------------------------------------------------------------------------------------------------------------------------------------------------------------------------------------------------------------------------------------------------------------------------------------------------------------------------------------------------------------------------------------------------------------------------------------------------------------------------------------------------------------------------------|
| P27 | <i>TRNT1</i>  | c.295C>T:p.(Arg99Trp)        | HOM | 12 | 0.989 | 0.500 | <p><b>Phenotypic similarity 0.476 to Retinitis pigmentosa and erythrocytic microcytosis associated with <i>TRNT1</i></b><br/> Best Phenotype Matches:<br/> <b>HP:0007642</b>, Congenital stationary night blindness - HP:0000662, Nyctalopia<br/> <b>HP:0007984</b>, Electronegative electroretinogram – <i>no matches</i></p> <p><b>Proximity score 0.500 in interactome to <i>RP9</i> and phenotypic similarity 0.622 to ?Retinitis pigmentosa 9 associated with <i>RP9</i></b><br/> Best Phenotype Matches:<br/> <b>HP:0007642</b>, Congenital stationary night blindness - HP:0000662, Nyctalopia<br/> <b>HP:0007984</b>, Electronegative electroretinogram - HP:0007688, Undetectable light- and dark-adapted electroretinogram</p> <p><b>Known diseases:</b><br/> OMIM:616084 Sideroblastic anemia with B-cell immunodeficiency, periodic fevers, and developmental delay - autosomal recessive<br/> OMIM:616959 Retinitis pigmentosa and erythrocytic microcytosis - autosomal recessive</p> |
| P80 | <i>COL9A3</i> | c.1739dup:p.(Gly581Trpfs*20) | HOM | 39 | 0.997 | 0.378 | <p><b>Phenotypic similarity 0.755 to Autosomal recessive Stickler syndrome associated with <i>COL9A3</i></b><br/> Best Phenotype Matches:<br/> <b>HP:0000545</b>, Myopia - HP:0000545, Myopia<br/> <b>HP:0008527</b>, Congenital sensorineural hearing impairment - HP:0000407, Sensorineural hearing impairment</p> <p><b>Proximity score 0.506 in interactome to <i>COL9A2</i> and phenotypic similarity 0.755 to Autosomal recessive Stickler syndrome associated with <i>COL9A2</i></b><br/> Best Phenotype Matches:</p>                                                                                                                                                                                                                                                                                                                                                                                                                                                                        |

|      |              |                             |     |    |       |       |                                                                                                                                                                                                                                                                                                                                                                                                                                                                                                                                                                                                                                                                                                                                                                                                                                                             |
|------|--------------|-----------------------------|-----|----|-------|-------|-------------------------------------------------------------------------------------------------------------------------------------------------------------------------------------------------------------------------------------------------------------------------------------------------------------------------------------------------------------------------------------------------------------------------------------------------------------------------------------------------------------------------------------------------------------------------------------------------------------------------------------------------------------------------------------------------------------------------------------------------------------------------------------------------------------------------------------------------------------|
|      |              |                             |     |    |       |       | <p><b>HP:0000545</b>, Myopia - HP:0000545, Myopia<br/> <b>HP:0008527</b>, Congenital sensorineural hearing impairment - HP:0000407, Sensorineural hearing impairment</p> <p><b>Proximity score 0.506 in interactome to COL9A2 and phenotypic similarity 0.388 to mouse mutant of COL9A2</b><br/> Best Phenotype Matches:<br/> <b>HP:0000545</b>, Myopia – <i>no matches</i><br/> <b>HP:0008527</b>, Congenital sensorineural hearing impairment - MP:0011967, increased or absent threshold for auditory brainstem response</p> <p><b>Known diseases - observed variants incompatible with mode of inheritance:</b><br/> OMIM:600969 Epiphyseal dysplasia, multiple, 3, with or without myopathy - autosomal dominant<br/> ORPHA:166002 Multiple epiphyseal dysplasia due to collagen 9 anomaly<br/> ORPHA:250984 Autosomal recessive Stickler syndrome</p> |
| P118 | <i>RP1L1</i> | c.603del:p.(Gly201Glyfs*30) | HOM | 42 | 0.996 | 0.405 | <p><b>Phenotypic similarity 0.809 to Occult macular dystrophy associated with RP1L1</b><br/> Best Phenotype Matches:<br/> <b>HP:0000510</b>, Rod-cone dystrophy - HP:0007754, Macular dystrophy</p> <p><b>Phenotypic similarity 0.695 to mouse mutant involving RP1L1</b><br/> Best Phenotype Matches:<br/> <b>HP:0000510</b>, Rod-cone dystrophy - MP:0001325, abnormal retina morphology</p> <p><b>Known diseases - observed variants incompatible with mode of inheritance:</b><br/> OMIM:613587 Occult macular dystrophy - autosomal dominant</p>                                                                                                                                                                                                                                                                                                       |

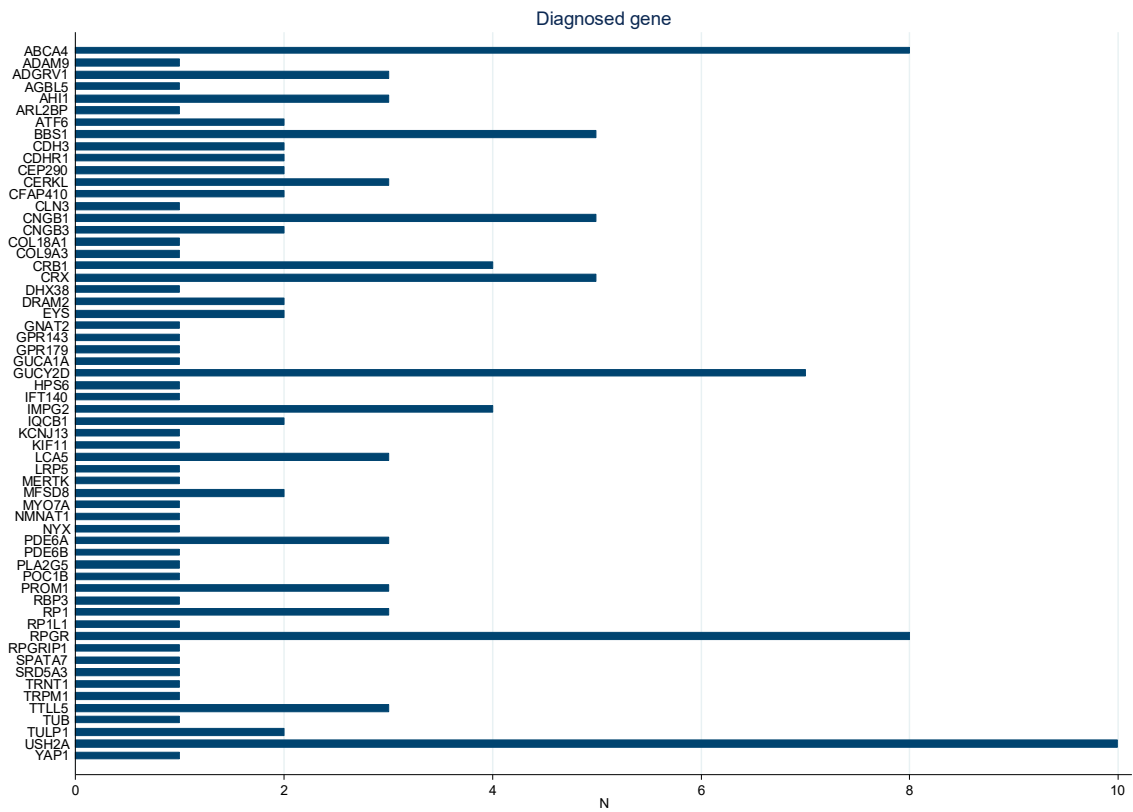

**Figure S1. Frequency distribution of the 60 diagnosed genes in the IRD patient dataset (N=134).**



**Retinitis pigmentosa (RP) (Rod-cone dystrophy, HP:0000510)**

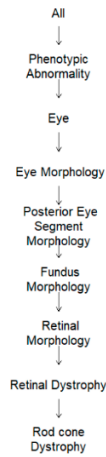

**Usher syndrome type II (USH2) (Rod-cone dystrophy, HP:0000510; Congenital sensorineural hearing impairment, HP:0008527; Mild hearing impairment, HP:0012712; Congenital stationary night blindness, HP:0007642; Decreased light- and dark-adapted electroretinogram amplitude, HP:0000654)**

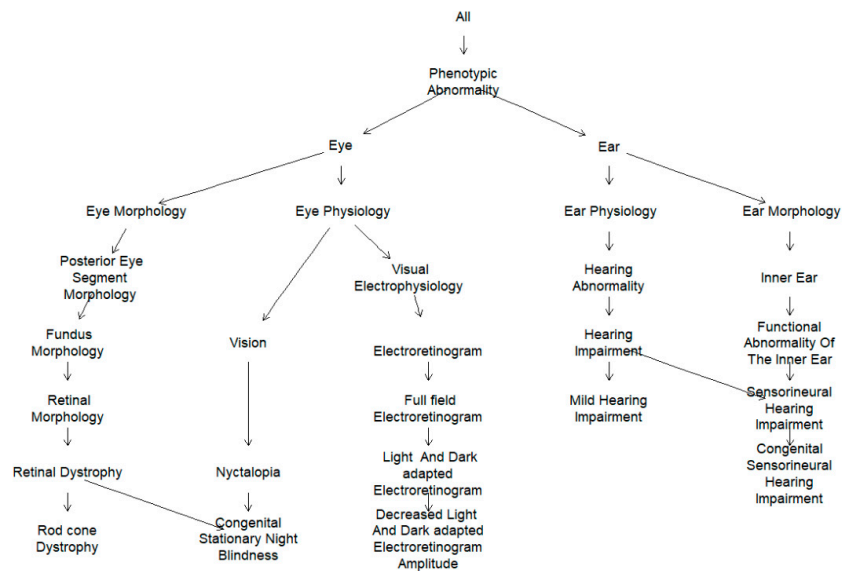

**Figure S3. HPO graphic visualization of the 19 clinical diagnoses in the IRD patient dataset.**

*(continued on the next page)*

**Leber congenital amaurosis (LCA)** (*Retinal dystrophy*, HP:0000556; *Visual impairment*, HP:0007758; *Undetectable electroretinogram*, HP:0000550; *Nystagmus*, HP:0000639)

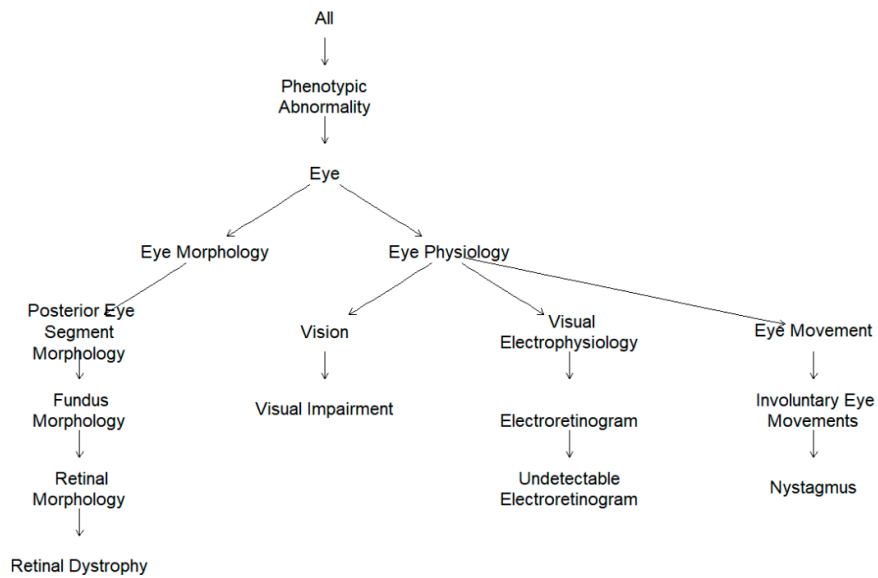

**Stargardt disease (STGD)** (*Macular dystrophy*, HP:0007754)

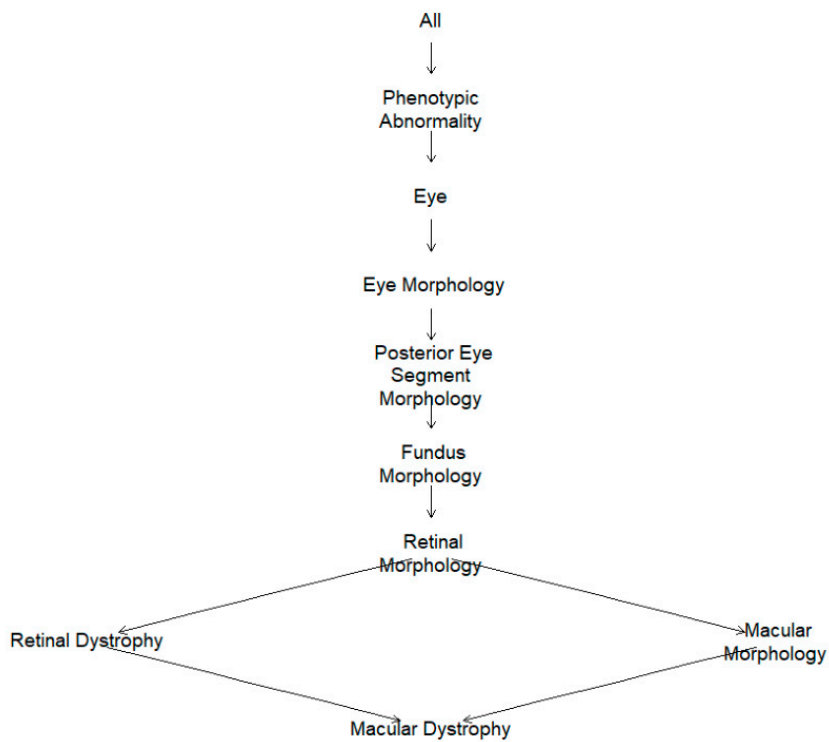

(continued on the next page)

**Congenital stationary night blindness (CSNB)** (*Congenital stationary night blindness*, HP:0007642; *Electronegative ERG*, HP:0007984)

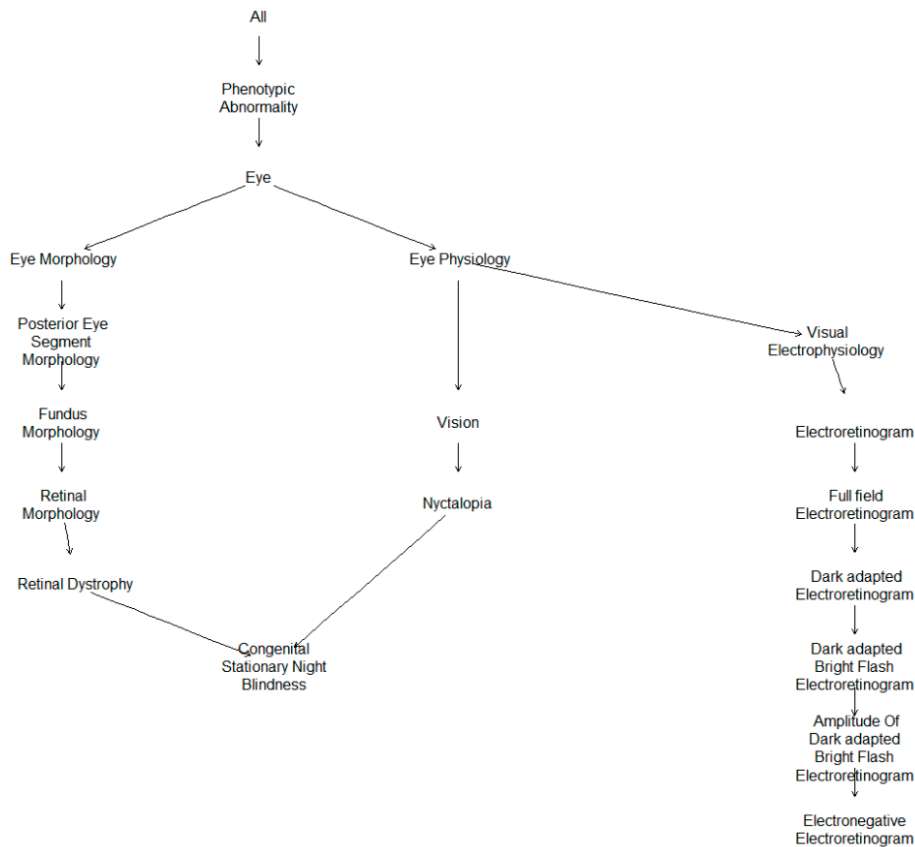

**Retinal dystrophy (RD)** (*Retinal dystrophy*, HP:0000556)

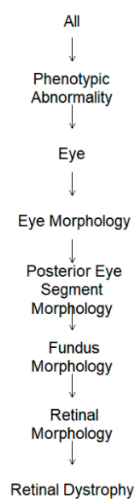

*(continued on the next page)*



**Cone-rod dystrophy (CRD)** (*Cone/Cone-rod dystrophy*, HP:0000548)

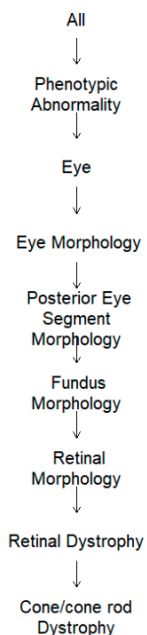

**Achromatopsia (ACHM)** (*Achromatopsia*, HP:0011516; *Abnormal light-adapted electroretinogram*, HP:0008275)

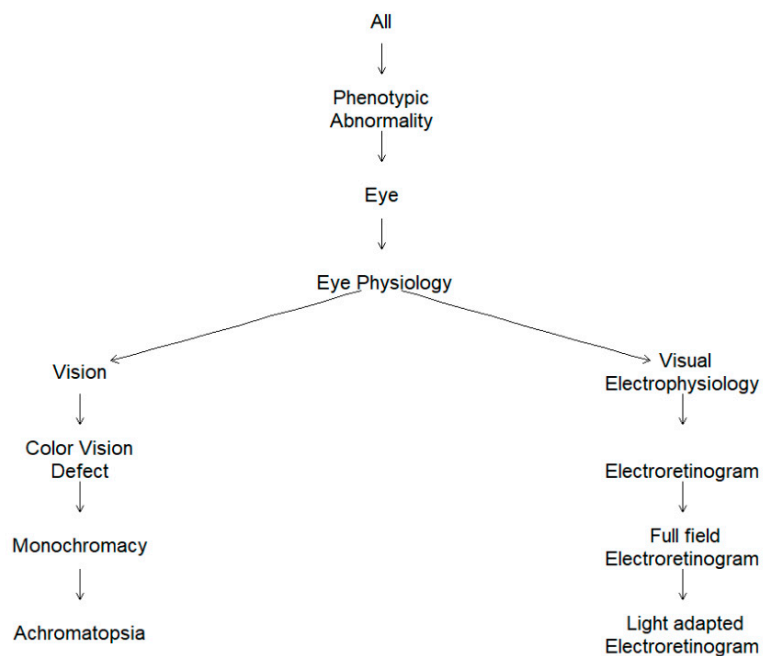

*(continued on the next page)*

**Ocular albinism (OALB)** (*Ocular albinism*, HP:0001107; *Iris hypopigmentation*, HP:0007730; *Hypoplasia of the fovea*, HP:0007750; *Asymmetrical distribution of pattern reversal visual evoked potentials*, HP:0030464)

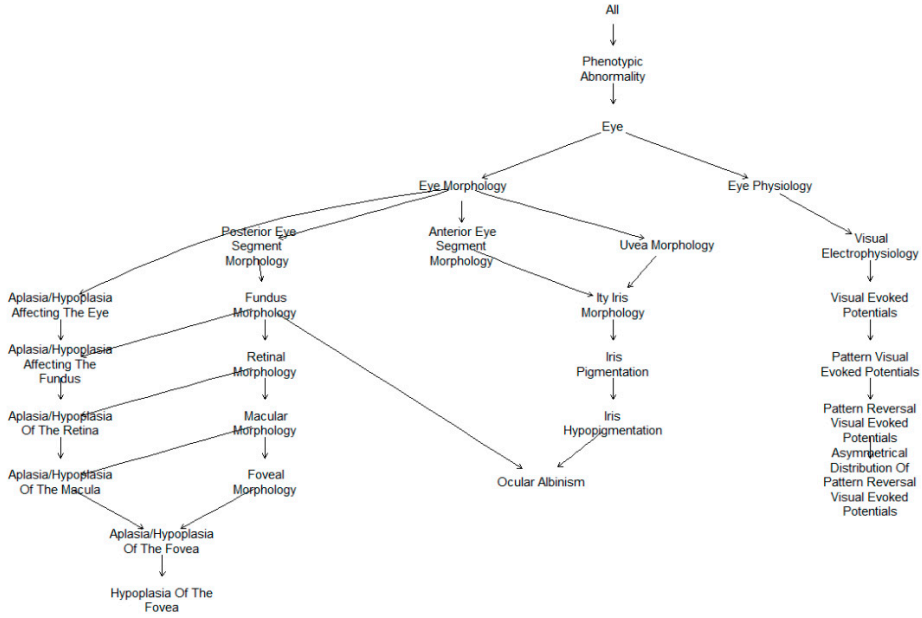

**Macular dystrophy (MD)** (*Macular dystrophy*, HP:0007754)

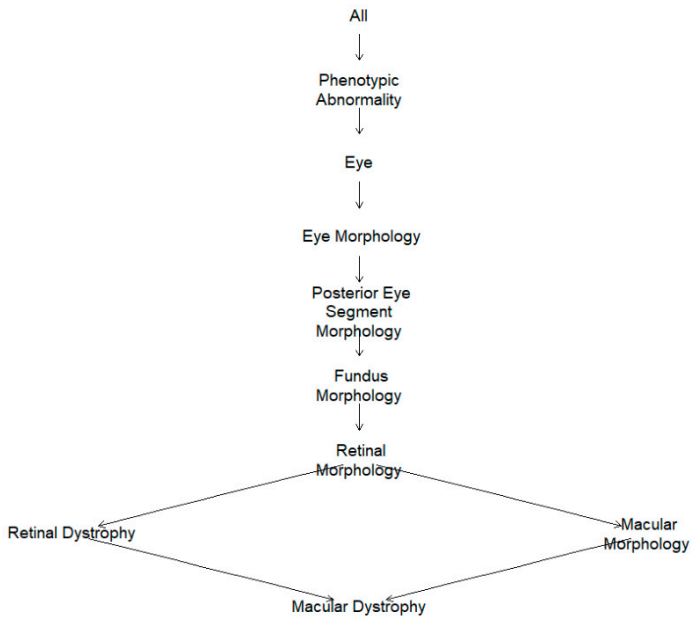

(continued on the next page)

**Early onset retinal dystrophy (EORD)** (*Retinal dystrophy*, HP:0000556; *Childhood onset*, HP:0011463)

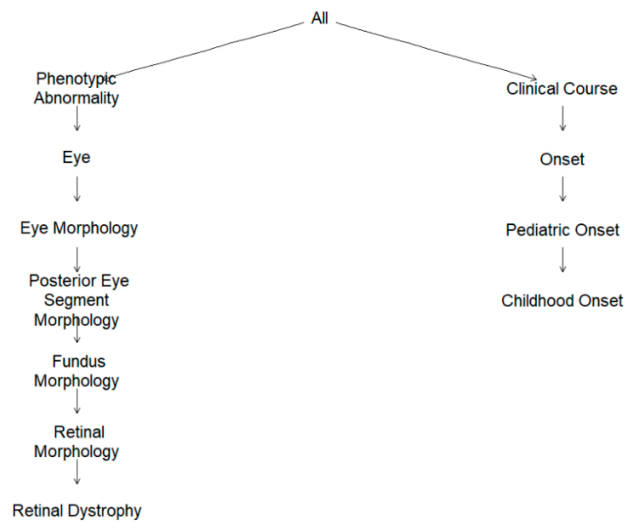

**Foveal hypoplasia (FH)** (*Hypoplasia of the fovea*, HP:0007750)

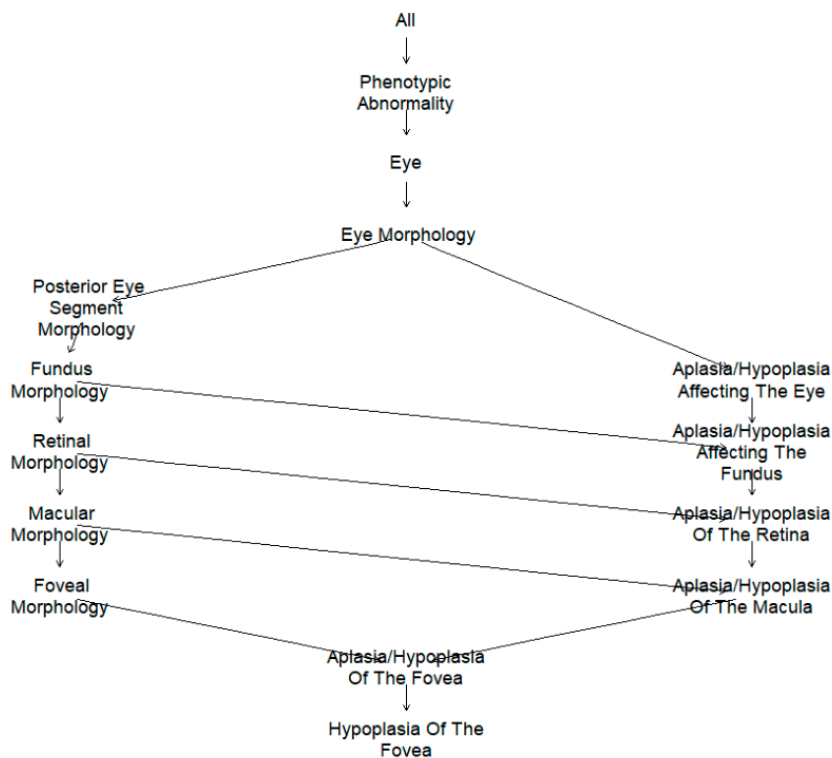

(continued on the next page)

**Optic atrophy (OATR)** (*Optic neuropathy*, HP:0001138; *Abnormality of visual evoked potentials*, HP:0000649; *Abnormal P50/N95 ratio of pattern electroretinogram*, HP:0030487)

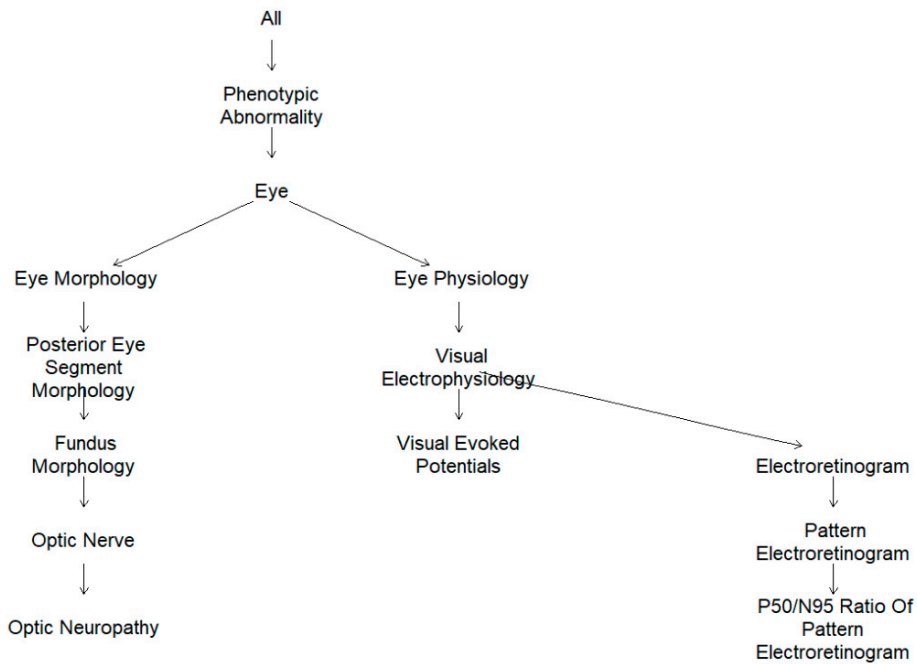

**Familial exudative vitreoretinopathy (FEVR)**

(*Exudative vitreoretinopathy*, HP:0030490)

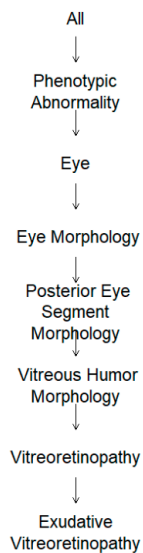

**Benign fleck retina (BFR)**

(*Retinal flecks*, HP:0012045)

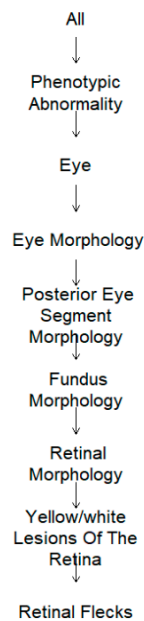

(continued on the next page)

**Occult macular dystrophy (OCMD)** (*Occult macular dystrophy*, HP:0030636;  
*Abnormal central response of multifocal electroretinogram*, HP:0030488)

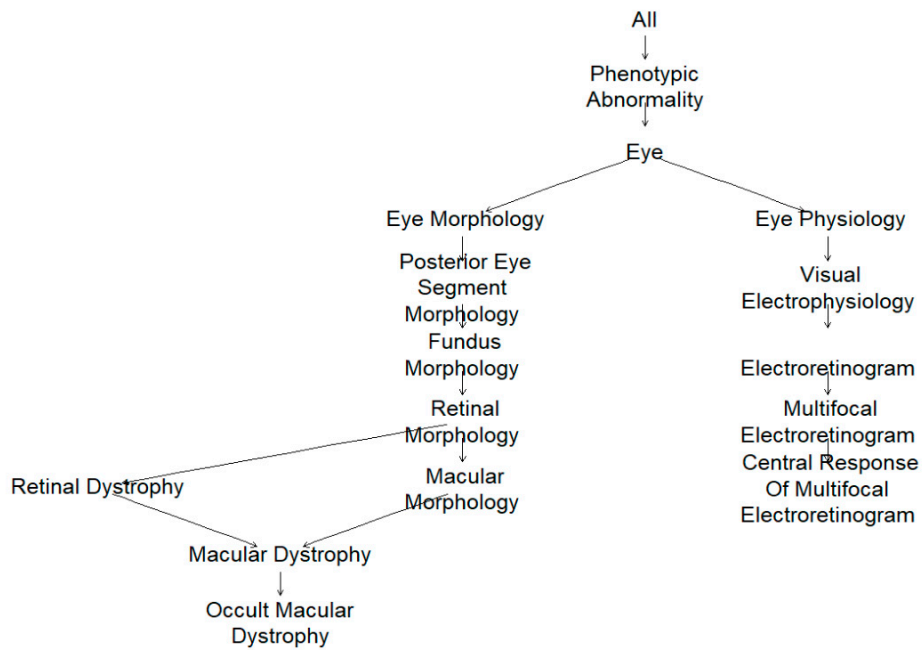

**Coloboma (COLOB)** (*Retinal coloboma*, HP:0000480)

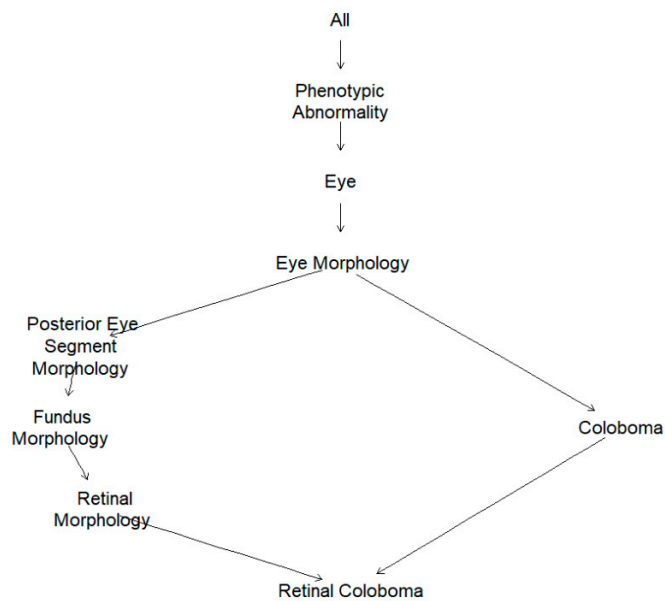

(continued on the next page)

**Myopia and deafness (Stickler syndrome) (STICKL)** (*Myopia*, HP:0000545; *Congenital sensorineural hearing impairment*, HP:0008527)

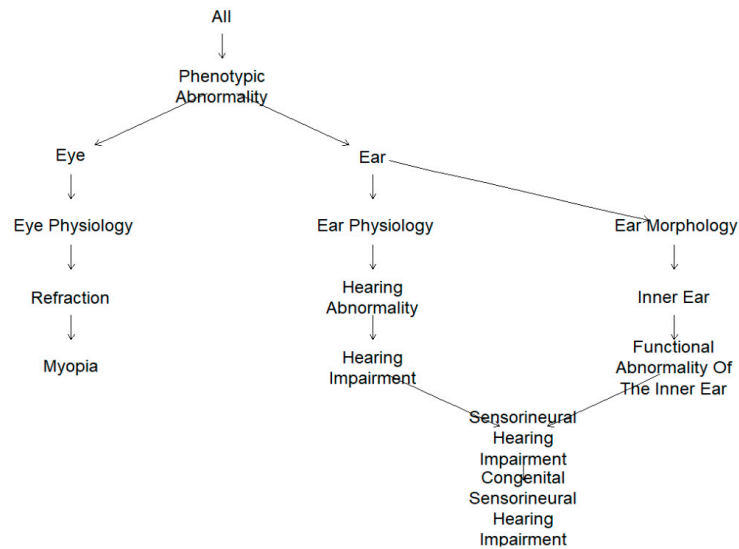

**Usher syndrome type I (USH1)** (*Rod-cone dystrophy*, HP:0000510; *Congenital sensorineural hearing impairment*, HP:0008527; *Profound sensorineural hearing impairment*, HP:0011476; *Congenital stationary night blindness*, HP:0007642; *Vestibular dysfunction*, HP:0001751; *Decreased light- and dark-adapted electroretinogram amplitude*, HP:0000654)

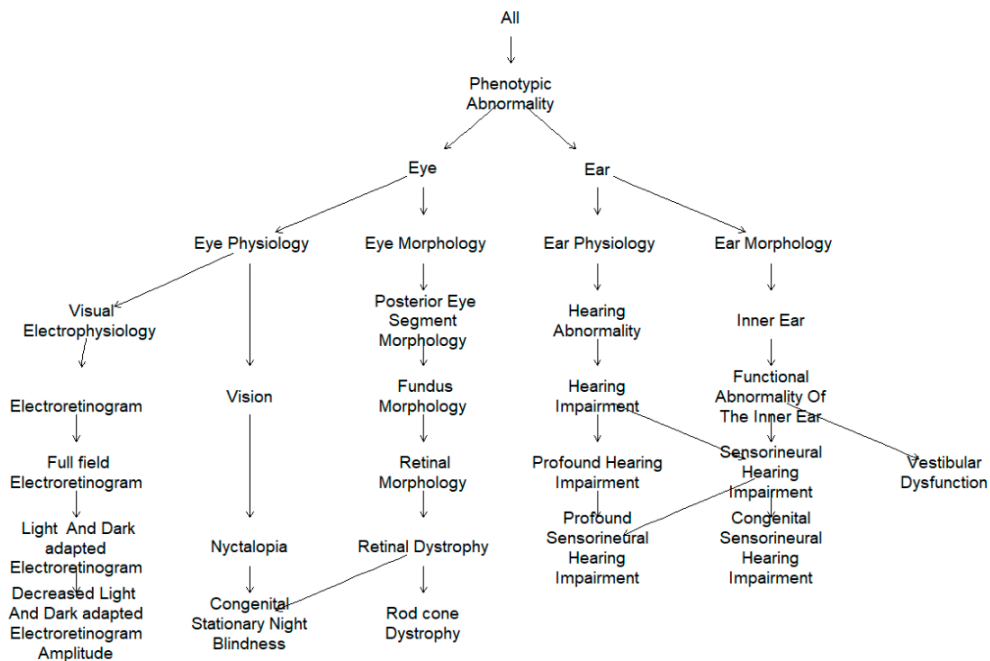

| ABCA4                                                                                                                                                                                                                                                                                                                                                                                                                                                                                                                                                                                                                                                                                                                                                                                                                                                                                                                                                                                                                                                                                                                                       | Exomiser Score: 0.998 | Phenotype Score: 1.000 | Variant Score: 0.999 |
|---------------------------------------------------------------------------------------------------------------------------------------------------------------------------------------------------------------------------------------------------------------------------------------------------------------------------------------------------------------------------------------------------------------------------------------------------------------------------------------------------------------------------------------------------------------------------------------------------------------------------------------------------------------------------------------------------------------------------------------------------------------------------------------------------------------------------------------------------------------------------------------------------------------------------------------------------------------------------------------------------------------------------------------------------------------------------------------------------------------------------------------------|-----------------------|------------------------|----------------------|
| <p><b>Phenotype matches:</b><br/> Phenotypic similarity 1.000 to <b>Cone-rod dystrophy 3 associated with ABCA4</b>.<br/> <b>Best Phenotype Matches:</b><br/> HP:0000548, Cone/cone-rod dystrophy - HP:0000548, Cone/cone-rod dystrophy</p> <p>Phenotypic similarity 0.571 to mouse mutant involving <b>ABCA4</b>.<br/> <b>Best Phenotype Matches:</b><br/> HP:0000548, Cone/cone-rod dystrophy - MP:0005201, abnormal retinal pigment epithelium morphology</p> <p>Proximity score 0.570 in <b>interactome</b> to <b>IMPG1</b> and phenotypic similarity 0.693 to <b>Macular dystrophy, vitelliform, 4 associated with IMPG1</b>.<br/> <b>Best Phenotype Matches:</b><br/> HP:0000548, Cone/cone-rod dystrophy - HP:0007754, Macular dystrophy</p> <p><b>Known diseases:</b><br/> OMIM:153800 Macular degeneration, age-related, 2 (susceptibility)<br/> OMIM:248200 Fundus flavimaculatus - autosomal recessive<br/> OMIM:601718 Retinitis pigmentosa 19 - autosomal recessive<br/> OMIM:604116 Cone-rod dystrophy 3 - unknown<br/> ORPHA:1872 Cone rod dystrophy<br/> ORPHA:791 Retinitis pigmentosa<br/> ORPHA:827 Stargardt disease</p> |                       |                        |                      |
| AUTOSOMAL_RECESSIVE                                                                                                                                                                                                                                                                                                                                                                                                                                                                                                                                                                                                                                                                                                                                                                                                                                                                                                                                                                                                                                                                                                                         | Exomiser Score: 0.998 | Phenotype Score: 1.000 | Variant Score: 0.999 |
| <p><b>Variants contributing to score:</b></p> <p><b>SPLICE_ACCEPTOR_VARIANT</b> chr1:g.94508455C&gt;A [0/1] rs767854160 (variation viewer)<br/> <b>Variant score: 0.999</b> <b>CONTRIBUTING VARIANT</b><br/> <b>Transcripts:</b><br/> ABCA4:ENST00000370225.3:c.3191-1G&gt;T:p.?</p> <p><b>MISSENSE_VARIANT</b> chr1:g.94512532T&gt;G [0/1]<br/> <b>Variant score: 0.999</b> <b>CONTRIBUTING VARIANT</b><br/> <b>Transcripts:</b><br/> ABCA4:ENST00000370225.3:c.2861A&gt;C:p.(Tyr954Ser)<br/> ABCA4:ENST00000535735.1:c.2639A&gt;C:p.(Tyr880Ser)</p> <p><b>Pathogenicity Data:</b><br/> Best Score: 1.0<br/> Mutation Taster: 1.000 (P)</p> <p><b>Frequency Data:</b><br/> Local: 0.0097%<br/> gnomAD_E_NFE: 0.0018%</p> <p><b>Pathogenicity Data:</b><br/> Best Score: 1.0<br/> Polyphen2: 0.765 (P)<br/> Mutation Taster: 1.000 (P)<br/> SIFT: 0.002 (D)</p>                                                                                                                                                                                                                                                                             |                       |                        |                      |

**Figure S4. Screenshot of the Exomiser HTML output file (from the DEFAULT analysis) for patient P14 who was clinically diagnosed with cone-rod dystrophy and molecularly diagnosed with missense variant c.2861A>C:p.(Tyr954Ser) and splice acceptor variant c.3191-1G>T:p.? in *ABCA4* (Table S1).**
